# Supplementary material for: Critical Assessment of the Important Residues Involved in the Dimerization and Catalysis of MERS Coronavirus Main Protease
Source: PubMed Central journal article supplement (PMC4682845; doi:10.1371/journal.pone.0144865), 2015-12-14
Supplement: pone.0144865.s001.pdf [file pone.0144865.s001.pdf]

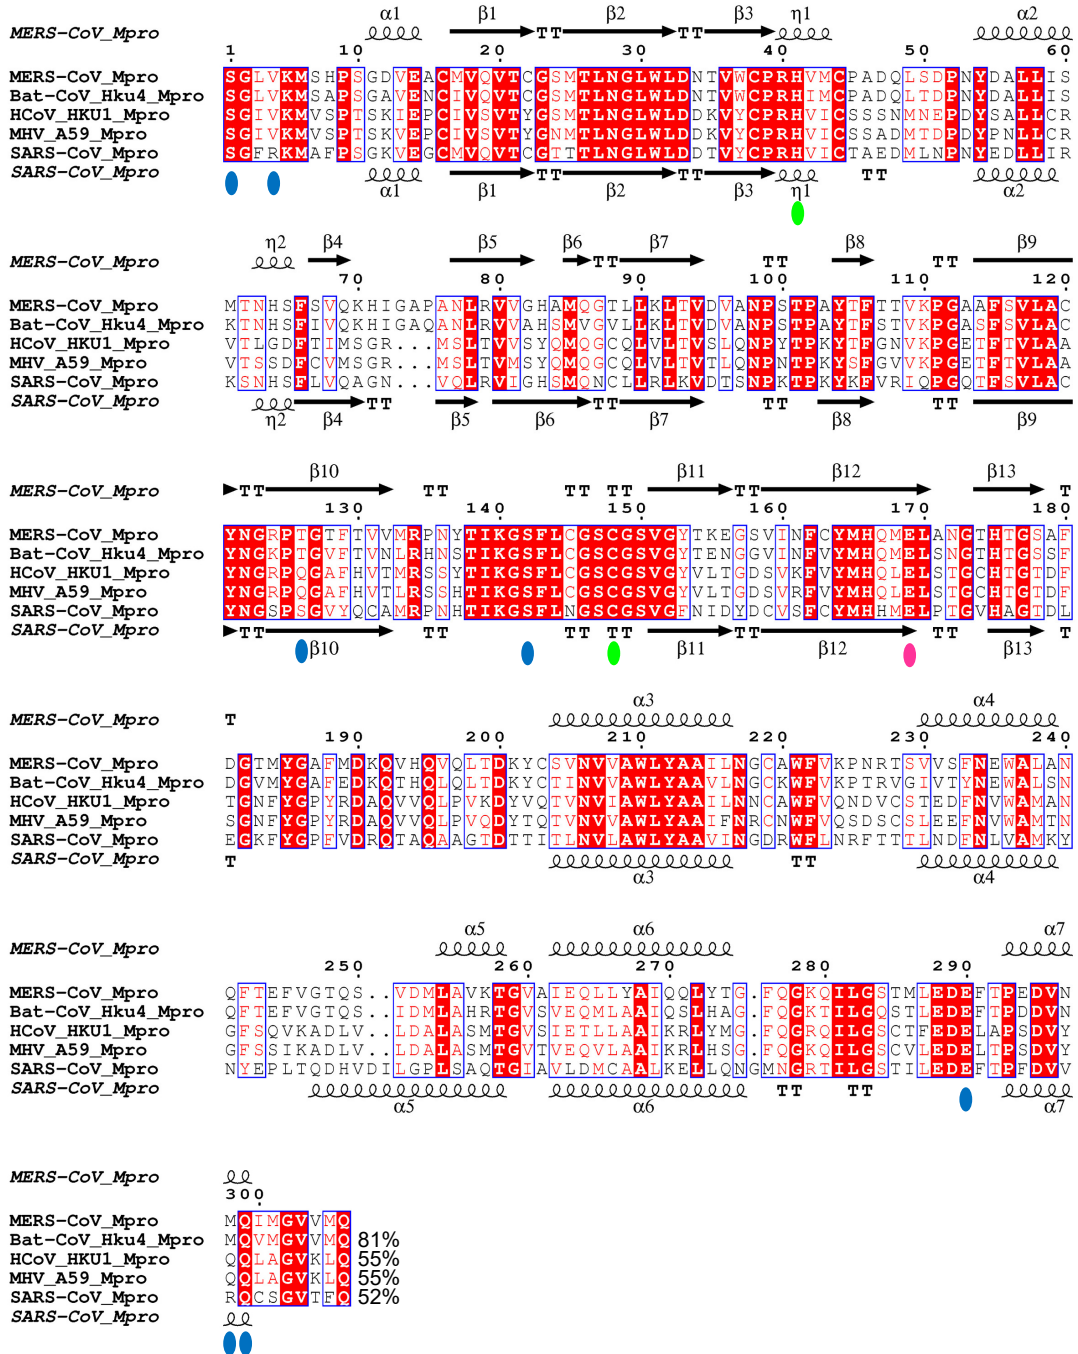

S1 Fig. Sequence alignment of betacoronaviral M<sup>pro</sup>.
