# Supplementary material for: Critical Assessment of the Important Residues Involved in the Dimerization and Catalysis of MERS Coronavirus Main Protease
Source: PubMed Central journal article supplement (PMC4682845; doi:10.1371/journal.pone.0144865), 2015-12-14
Supplement: pone.0144865.s002.pdf [file pone.0144865.s002.pdf]

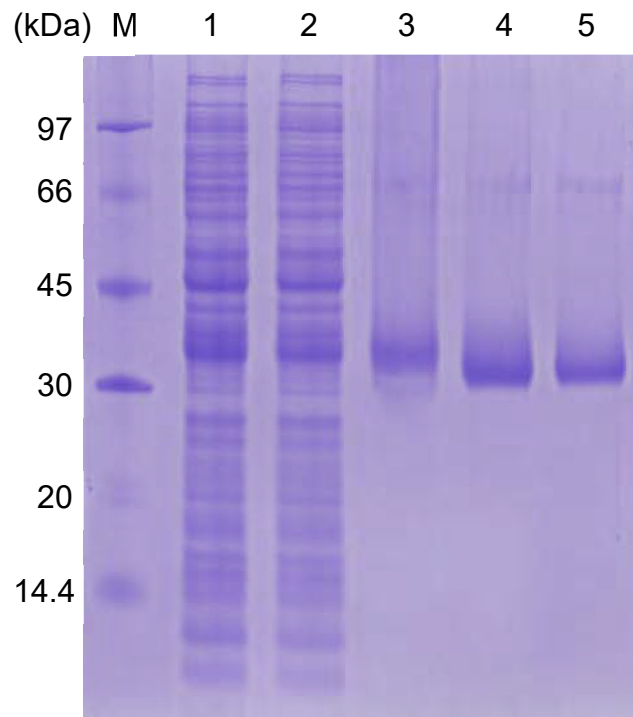

**S2 Fig. Expression and purification of recombinant MERS-CoV M<sup>pro</sup>.**
