# Supplementary material for: Critical Assessment of the Important Residues Involved in the Dimerization and Catalysis of MERS Coronavirus Main Protease
Source: PubMed Central journal article supplement (PMC4682845; doi:10.1371/journal.pone.0144865), 2015-12-14
Supplement: pone.0144865.s003.pdf [file pone.0144865.s003.pdf]

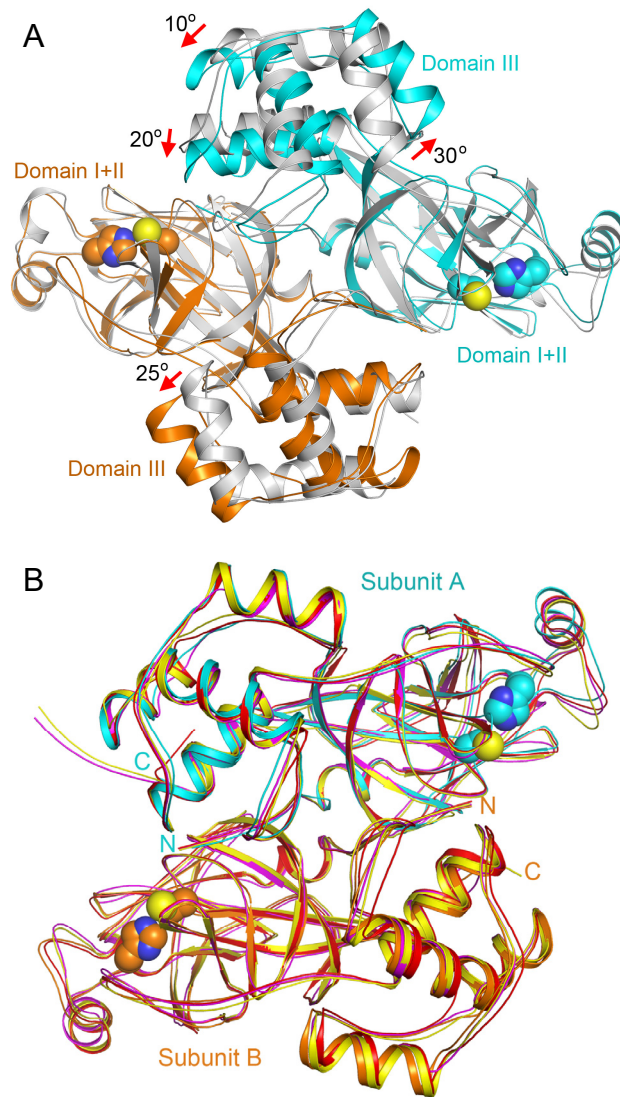

**S3 Fig. Comparison with the structure of MERS-CoV M<sup>pro</sup> with that of SARS-CoV M<sup>pro</sup> (A) and those of ligand-bound complex, dimeric C148A mutant and bat-CoV HKU4 M<sup>pro</sup> (B).**
